# Supplementary material for: Enhancement of Inhibition of the Pseudomonas sp. Biofilm Formation on Bacterial Cellulose-Based Wound Dressing by the Combined Action of Alginate Lyase and Gentamicin
Source: MDPI journal article supplement (doi:10.3390/ijms24054740), 2023-03-01
Supplement: s1 [file s1]

***Enhancement of inhibition the *Pseudomonas* sp., biofilm formation on bacterial cellulose based wound dressing by combined action of alginate lyase and gentamicin***

Magdalena Szymańska<sup>1</sup>, Katarzyna Przygodzka<sup>1</sup>, Anna Żywicka<sup>1</sup>, Bartłomiej Grygorcewicz<sup>2</sup>, Piotr Sobolewski<sup>3</sup>, Sylwia Mozia<sup>4</sup>, Marcin Śmiglak, Radosław Drozd<sup>1</sup>

<sup>1</sup>Department of Microbiology and Biotechnology, Faculty of Biotechnology and Animal Husbandry, West Pomeranian University of Technology in Szczecin, 45 Piastow Avenue, 71-311, Szczecin, Poland

<sup>2</sup>Department of Laboratory Medicine, Chair of Microbiology, Immunology and Laboratory Medicine, Pomeranian Medical University in Szczecin, 72 Powstańców Wielkopolskich Str., 70-111, Szczecin, Poland

<sup>3</sup>Department of Polymer and Biomaterials Science, Faculty of Chemical Technology and Engineering, West Pomeranian University of Technology in Szczecin, 45 Piastow Avenue, 71-311, Szczecin, Poland

<sup>4</sup>Department of Inorganic Chemical Technology and Environment Engineering, Faculty of Chemical Technology and Engineering, West Pomeranian University of Technology in Szczecin, ul. Pułaskiego 10, 70-322 Szczecin, Poland

<sup>5</sup>Poznan Science and Technology Park (PPNT), Rubież 5, 61-612 Poznan, Poland

**Table S1. Oligonucleotides for PCR amplification and colony-PCR.**

| Primer     | Sequence (5'to 3')                            |
|------------|-----------------------------------------------|
| AlgL_fwd   | cctggcgccgcgcggcagccatATGGCCGACCTGGTACCCCCGCC |
| AlgL_rvs   | aagcttgctgacggagctcgaattcTCAACTCCCCCTTCGCGGC  |
| pET28a_fwd | tgagatccggctgctaacaagc                        |
| pET28a_rvs | catatggctgccgcggcgg                           |
| T7_fwd     | TAATACGACTCACTATAGGG                          |
| T7_rvs     | GCTAGTTATTGCTCAGCGG                           |

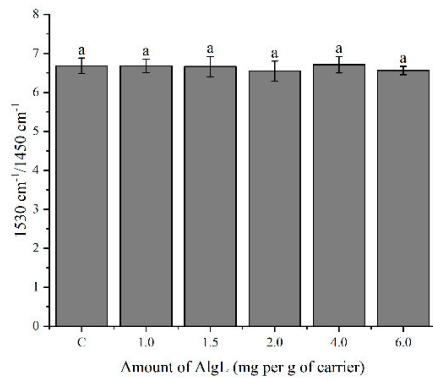

**(a)**

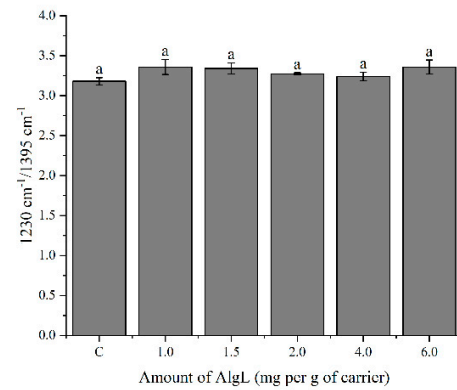

**(b)**

**Figure S1.** The relative changes in the band ratio 1530 cm<sup>-1</sup>/1450 cm<sup>-1</sup> (a) and 1230 cm<sup>-1</sup>/1395 cm<sup>-1</sup> (b). The means with the same superscript are not significant different with  $p > 0.05$ . Error bars represent standard deviation.

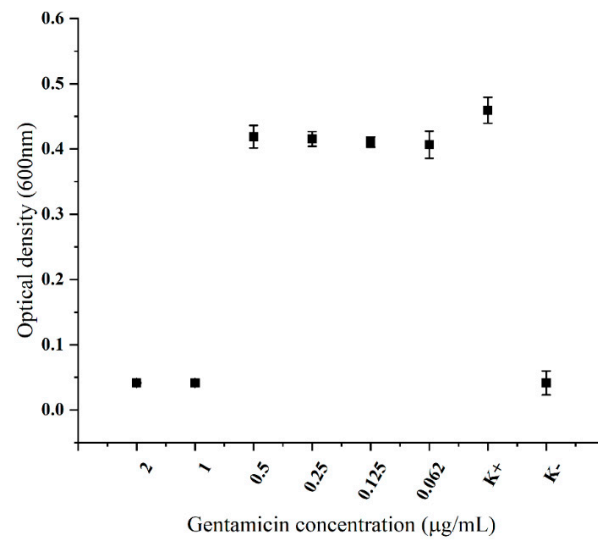

**Figure S2.** Minimal inhibitory concentration (MIC) of gentamicin for *P. aeruginosa* PAO-1. K- is a negative control, and K+ is a positive control.
